# Supplementary material
Source: PubMed Central journal article supplement (PMC8908231)
Supplement: jamadermatol-e220036-s001.pdf [file jamadermatol-e220036-s001.pdf]

## Supplementary Online Content

Sargen MR, Cahoon EK, Yu KJ, et al. Spectrum of nonkeratinocyte skin cancer risk among solid organ transplant recipients in the US. *JAMA Dermatol*. Published online March 9, 2022. doi:10.1001/jamadermatol.2022.0036

**eTable 1.** Cancer ICD-O-3 Histology/Behavior Codes

**eTable 2.** Unadjusted Risk Estimates for Melanoma, Merkel Cell Carcinoma, and Adnexal Cancers in Transplant Recipients

**eTable 3.** Unadjusted Risk Estimates for Kaposi Sarcoma and Lymphoma in Transplant Recipients

**eTable 4.** Transplant Donor and Recipient EBV Serologic Status at Time of Transplant and Lymphoma Risk

**eTable 5.** Baseline Induction and Maintenance Immunosuppressive Therapy and Risk for Melanoma, Merkel Cell Carcinoma, and Adnexal Cancers in Transplant Recipients

**eTable 6.** Baseline Induction and Maintenance Immunosuppressive Therapy and Risk for Kaposi Sarcoma and Lymphoma in Transplant Recipients

**This supplementary material has been provided by the authors to give readers additional information about their work.**

**eTable 1. Cancer ICD-O-3 histology/behavior codes**

| <b>Cancer type</b>                       | <b>ICD-O-3 histology/behavior code</b>                                                                                                                         |
|------------------------------------------|----------------------------------------------------------------------------------------------------------------------------------------------------------------|
| <b>Melanoma</b>                          | 8720/3, 8721/3, 8722/3, 8723/3, 8726/3, 8730/3, 8740/3, 8741/3, 8742/3, 8743/3, 8744/3, 8745/3, 8761/3, 8770/3, 8771/3, 8772/3, 8773/3, 8774/3, 8780/3, 8790/3 |
| Superficial spreading melanoma           | 8743/3                                                                                                                                                         |
| Lentigo maligna melanoma                 | 8742/3                                                                                                                                                         |
| Nodular melanoma                         | 8721/3                                                                                                                                                         |
| Acral lentiginous melanoma               | 8744/3                                                                                                                                                         |
| Desmoplastic melanoma                    | 8745/3                                                                                                                                                         |
| Amelanotic melanoma                      | 8730/3                                                                                                                                                         |
| Other melanoma subtypes or not specified | 8720/3, 8722/3, 8723/3, 8726/3, 8740/3, 8741/3, 8761/3, 8770/3, 8771/3, 8772/3, 8773/3, 8774/3, 8780/3, 8790/3                                                 |
| <b>Merkel cell carcinoma</b>             | 8247/3                                                                                                                                                         |
| <b>Adnexal cancers</b>                   | 8200/3, 8390/3, 8400/3, 8401/3, 8402/3, 8407/3, 8408/3, 8409/3, 8410/3, 8413/3, 8480/3                                                                         |
| Sebaceous carcinoma                      | 8410/3                                                                                                                                                         |
| Ecrrine carcinoma                        | 8200/3, 8390/3, 8400/3, 8401/3, 8402/3, 8407/3, 8408/3, 8409/3, 8413/3, 8480/3                                                                                 |
| Sweat gland adenocarcinoma               | 8400/3                                                                                                                                                         |
| Nodular hidradenoma, malignant           | 8402/3                                                                                                                                                         |
| Sclerosing sweat duct carcinoma          | 8407/3                                                                                                                                                         |
| Ecrrine papillary adenocarcinoma         | 8408/3                                                                                                                                                         |
| Ecrrine poroma, malignant                | 8409/3                                                                                                                                                         |
| Ecrrine adenocarcinoma                   | 8413/3                                                                                                                                                         |
| Mucinous adenocarcinoma                  | 8480/3                                                                                                                                                         |
| Apocrine adenocarcinoma                  | 8401/3                                                                                                                                                         |
| Adenoid cystic carcinoma                 | 8200/3                                                                                                                                                         |
| Skin appendage carcinoma                 | 8390/3                                                                                                                                                         |
| <b>Sarcomas</b>                          | 8710/3, 8711/3, 8832/3, 8833/3, 8890/3, 8891/3, 8893/3, 8896/3, 9120/3, 9125/3, 9140/3, 9170/3                                                                 |
| Dermatofibrosarcoma Protuberans          | 8832/3, 8833/3                                                                                                                                                 |
| Cutaneous Leiomyosarcoma                 | 8890/3, 8891/3, 8893/3, 8896/3                                                                                                                                 |
| Cutaneous Angiosarcoma                   | 9120/3, 9125/3, 9170/3                                                                                                                                         |
| Glomangiosarcoma                         | 8710/3, 8711/3                                                                                                                                                 |
| <b>Kaposi sarcoma</b>                    | 9140/3                                                                                                                                                         |
| <b>Lymphoma</b>                          | 9680/3, 9700/3, 9701/3, 9708/3, 9709/3, 9718/3, 9719/3                                                                                                         |

|                                                     |                                                |
|-----------------------------------------------------|------------------------------------------------|
| T-cell lymphoma                                     | 9700/3, 9701/3, 9708/3, 9709/3, 9718/3, 9719/3 |
| Mycosis fungoides                                   | 9700/3                                         |
| Sézary syndrome                                     | 9701/3                                         |
| Anaplastic large cell lymphoma                      | 9718/3                                         |
| Subcutaneous panniculitis-like T-cell lymphoma      | 9708/3                                         |
| Extranodal NK/T-cell lymphoma, nasal type           | 9719/3                                         |
| Peripheral T-cell lymphoma, not otherwise specified | 9709/3                                         |
| Diffuse large B-cell lymphoma                       | 9680/3                                         |

**eTable 2. Unadjusted risk estimates for melanoma, Merkel cell carcinoma, and adnexal cancers in transplant recipients**

| Characteristic                     | Melanoma |                  |        | Merkel cell carcinoma |                  |        | Sebaceous carcinoma |                  |        | Nonsebaceous adnexal cancers |                  |        |
|------------------------------------|----------|------------------|--------|-----------------------|------------------|--------|---------------------|------------------|--------|------------------------------|------------------|--------|
|                                    | No.      | IRR (95% CI)     | P      | No.                   | IRR (95% CI)     | P      | No.                 | IRR (95% CI)     | P      | No.                          | IRR (95% CI)     | P      |
| <b>Total</b>                       | 1,471    |                  |        | 334                   |                  |        | 170                 |                  |        | 84                           |                  |        |
| <b>Sex</b>                         |          |                  |        |                       |                  |        |                     |                  |        |                              |                  |        |
| Female                             | 334      | Reference        |        | 72                    | Reference        |        | 36                  | Reference        |        | 24                           | Reference        |        |
| Male                               | 1,137    | 2.19 (1.94-2.48) | <0.001 | 262                   | 2.35 (1.81-3.04) | <0.001 | 134                 | 2.40 (1.66-3.47) | <0.001 | 60                           | 1.61 (1.00-2.59) | 0.05   |
| <b>Race and ethnicity</b>          |          |                  |        |                       |                  |        |                     |                  |        |                              |                  |        |
| Non-Hispanic White                 | 1,419    | Reference        |        | 303                   | Reference        |        | 127                 | Reference        |        | 76                           | Reference        |        |
| Non-Hispanic Black                 | 15       | 0.04 (0.03-0.07) | <0.001 | 5                     | 0.07 (0.03-0.16) | <0.001 | 9                   | 0.28 (0.14-0.55) | <0.001 | 2                            | 0.10 (0.03-0.43) | 0.002  |
| Hispanic or Latino                 | 31       | 0.10 (0.07-0.14) | <0.001 | 21                    | 0.31 (0.20-0.48) | <0.001 | 23                  | 0.81 (0.52-1.26) | 0.35   | 4                            | 0.24 (0.09-0.64) | 0.005  |
| Asian or Pacific Islander          | 6        | 0.05 (0.02-0.11) | <0.001 | 5                     | 0.20 (0.08-0.47) | <0.001 | 11                  | 1.02 (0.55-1.90) | 0.94   | 2                            | 0.31 (0.08-1.27) | 0.10   |
| <b>Age at transplant, years</b>    |          |                  |        |                       |                  |        |                     |                  |        |                              |                  |        |
| 0-34                               | 77       | Reference        |        | 9                     | Reference        |        | 4                   | Reference        |        | 4                            | Reference        |        |
| 35-49                              | 292      | 2.77 (2.15-3.56) | <0.001 | 69                    | 5.60 (2.80-11.2) | <0.001 | 36                  | 6.57 (2.34-18.5) | <0.001 | 17                           | 3.10 (1.04-9.22) | 0.04   |
| 50-64                              | 776      | 6.10 (4.83-7.71) | <0.001 | 177                   | 11.9 (6.09-23.3) | <0.001 | 95                  | 14.4 (5.29-39.1) | <0.001 | 45                           | 6.81 (2.45-18.9) | <0.001 |
| ≥65                                | 326      | 11.0 (8.58-14.1) | <0.001 | 79                    | 22.8 (11.4-45.5) | <0.001 | 35                  | 22.7 (8.08-64.0) | <0.001 | 18                           | 11.7 (3.96-34.5) | <0.001 |
| P for trend                        |          |                  | <0.001 |                       |                  | <0.001 |                     |                  | <0.001 |                              |                  | <0.001 |
| <b>Transplanted organ</b>          |          |                  |        |                       |                  |        |                     |                  |        |                              |                  |        |
| Kidney                             | 814      | Reference        |        | 206                   | Reference        |        | 97                  | Reference        |        | 54                           | Reference        |        |
| Liver                              | 273      | 0.87 (0.76-1.00) | 0.05   | 46                    | 0.58 (0.42-0.80) | 0.001  | 21                  | 0.56 (0.35-0.90) | 0.02   | 10                           | 0.48 (0.25-0.95) | 0.03   |
| Heart and/or lung                  | 315      | 1.53 (1.35-1.75) | <0.001 | 72                    | 1.39 (1.06-1.81) | 0.02   | 47                  | 1.92 (1.36-2.72) | <0.001 | 19                           | 1.40 (0.83-2.35) | 0.21   |
| Other or multiple                  | 69       | 0.90 (0.71-1.15) | 0.41   | 10                    | 0.52 (0.27-0.97) | 0.04   | 5                   | 0.55 (0.22-1.35) | 0.19   | 1                            | 0.20 (0.03-1.43) | 0.11   |
| <b>Calendar year of transplant</b> |          |                  |        |                       |                  |        |                     |                  |        |                              |                  |        |
| 1987-1994                          | 204      | Reference        |        | 80                    | Reference        |        | 19                  | Reference        |        | 18                           | Reference        |        |
| 1995-2002                          | 533      | 0.90 (0.77-1.06) | 0.20   | 113                   | 0.49 (0.37-0.65) | <0.001 | 68                  | 1.23 (0.74-2.05) | 0.42   | 28                           | 0.54 (0.30-0.97) | 0.04   |
| 2003-2010                          | 558      | 0.97 (0.82-1.13) | 0.66   | 116                   | 0.51 (0.38-0.68) | <0.001 | 67                  | 1.24 (0.75-2.07) | 0.40   | 31                           | 0.61 (0.34-1.09) | 0.09   |

|                                                   |       |                  |        |     |                  |        |     |                  |        |    |                  |        |
|---------------------------------------------------|-------|------------------|--------|-----|------------------|--------|-----|------------------|--------|----|------------------|--------|
| 2011-2017                                         | 176   | 0.95 (0.77-1.16) | 0.58   | 25  | 0.34 (0.22-0.54) | <0.001 | 16  | 0.92 (0.47-1.79) | 0.81   | 7  | 0.43 (0.18-1.02) | 0.06   |
| <b>Posttransplant basal cell carcinoma</b>        |       |                  |        |     |                  |        |     |                  |        |    |                  |        |
| No                                                | 1,378 | Reference        |        | 294 | Reference        |        | 156 | Reference        |        | 74 | Reference        |        |
| Yes                                               | 93    | 4.50 (3.65-5.55) | <0.001 | 40  | 9.07 (6.52-12.6) | <0.001 | 14  | 5.98 (3.46-10.3) | <0.001 | 10 | 9.01 (4.66-17.4) | <0.001 |
| <b>Posttransplant squamous cell carcinoma</b>     |       |                  |        |     |                  |        |     |                  |        |    |                  |        |
| No                                                | 1,362 | Reference        |        | 270 | Reference        |        | 144 | Reference        |        | 69 | Reference        |        |
| Yes                                               | 109   | 3.94 (3.24-4.79) | <0.001 | 64  | 11.7 (8.88-15.3) | <0.001 | 26  | 8.88 (5.85-13.5) | <0.001 | 15 | 10.7 (6.12-18.7) | <0.001 |
| <b>Annual mean daily UVR exposure<sup>a</sup></b> |       |                  |        |     |                  |        |     |                  |        |    |                  |        |
| Quartile 1                                        | 389   | Reference        |        | 84  | Reference        |        | 56  | Reference        |        | 18 | Reference        |        |
| Quartile 2                                        | 390   | 0.84 (0.73-0.97) | 0.02   | 75  | 0.75 (0.55-1.03) | 0.07   | 35  | 0.53 (0.34-0.80) | 0.003  | 18 | 0.84 (0.44-1.62) | 0.60   |
| Quartile 3                                        | 382   | 0.91 (0.79-1.05) | 0.21   | 88  | 0.98 (0.72-1.32) | 0.87   | 45  | 0.75 (0.51-1.11) | 0.15   | 21 | 1.09 (0.58-2.04) | 0.80   |
| Quartile 4                                        | 310   | 0.81 (0.70-0.94) | 0.005  | 87  | 1.05 (0.78-1.42) | 0.75   | 34  | 0.61 (0.40-0.94) | 0.03   | 27 | 1.52 (0.84-2.76) | 0.17   |
| <i>P</i> for trend                                |       |                  | 0.02   |     |                  | 0.39   |     |                  | 0.08   |    |                  | 0.10   |
| <b>Time since transplant</b>                      |       |                  |        |     |                  |        |     |                  |        |    |                  |        |
| Within 1 year                                     | 155   | Reference        |        | 18  | Reference        |        | 3   | Reference        |        | 4  | Reference        |        |
| 1 to 4.9 years                                    | 625   | 1.33 (1.12-1.59) | 0.001  | 104 | 1.91 (1.16-3.15) | 0.01   | 57  | 6.28 (1.97-20.1) | 0.002  | 27 | 2.23 (0.78-6.38) | 0.13   |
| 5 to 9.9 years                                    | 448   | 1.45 (1.21-1.75) | <0.001 | 124 | 3.47 (2.11-5.68) | <0.001 | 60  | 10.1 (3.16-32.1) | <0.001 | 35 | 4.40 (1.56-12.4) | 0.005  |
| ≥10 years                                         | 243   | 1.51 (1.23-1.84) | <0.001 | 88  | 4.70 (2.83-7.80) | <0.001 | 50  | 16.0 (5.00-51.3) | <0.001 | 18 | 4.32 (1.46-12.8) | 0.008  |
| <i>P</i> for trend                                |       |                  | <0.001 |     |                  | <0.001 |     |                  | <0.001 |    |                  | <0.001 |
| <b>Transplant number</b>                          |       |                  |        |     |                  |        |     |                  |        |    |                  |        |
| First                                             | 1,358 | Reference        |        | 298 | Reference        |        | 154 | Reference        |        | 76 | Reference        |        |
| Second or later                                   | 113   | 0.91 (0.75-1.10) | 0.33   | 36  | 1.32 (0.93-1.86) | 0.12   | 16  | 1.13 (0.68-1.90) | 0.63   | 8  | 1.15 (0.55-2.38) | 0.71   |

Abbreviations:

IRR – Incidence rate ratio

CI – Confidence interval

UVR – UV radiation

<sup>a</sup> Quartile cutoffs for ambient UVR (4.6-26.3, 26.4-34.2, 34.3-45.5, and 45.6-84.1 mW/m<sup>2</sup>) were based on the UVR (UV-B, 305nm) distribution among the transplant population.

**eTable 3. Unadjusted risk estimates for Kaposi sarcoma and lymphoma in transplant recipients**

| Characteristic                                    | Kaposi sarcoma |                  |          | B- or T-cell lymphoma |                  |          |
|---------------------------------------------------|----------------|------------------|----------|-----------------------|------------------|----------|
|                                                   | No.            | IRR (95% CI)     | <i>P</i> | No.                   | IRR (95% CI)     | <i>P</i> |
| <b>Total</b>                                      | 186            |                  |          | 108                   |                  |          |
| <b>Sex</b>                                        |                |                  |          |                       |                  |          |
| Female                                            | 38             | Reference        |          | 40                    | Reference        |          |
| Male                                              | 148            | 2.51 (1.76-3.59) | <0.001   | 68                    | 1.10 (0.74-1.62) | 0.65     |
| <b>Race and ethnicity</b>                         |                |                  |          |                       |                  |          |
| Non-Hispanic White                                | 84             | Reference        |          | 74                    | Reference        |          |
| Non-Hispanic Black                                | 43             | 2.03 (1.41-2.94) | <0.001   | 13                    | 0.70 (0.39-1.26) | 0.23     |
| Hispanic or Latino                                | 52             | 2.77 (1.96-3.91) | <0.001   | 17                    | 1.03 (0.61-1.74) | 0.92     |
| Asian or Pacific Islander                         | 7              | 0.99 (0.46-2.13) | 0.97     | 4                     | 0.64 (0.23-1.75) | 0.38     |
| <b>Age at transplant, years</b>                   |                |                  |          |                       |                  |          |
| 0-34                                              | 11             | Reference        |          | 21                    | Reference        |          |
| 35-49                                             | 26             | 1.73 (0.85-3.49) | 0.13     | 30                    | 1.04 (0.60-1.82) | 0.88     |
| 50-64                                             | 96             | 5.28 (2.83-9.86) | <0.001   | 41                    | 1.18 (0.70-2.00) | 0.53     |
| ≥65                                               | 53             | 12.5 (6.54-24.0) | <0.001   | 16                    | 1.98 (1.03-3.79) | 0.04     |
| <i>P</i> for trend                                |                |                  | <0.001   |                       |                  | 0.07     |
| <b>Transplanted organ</b>                         |                |                  |          |                       |                  |          |
| Kidney                                            | 123            | Reference        |          | 63                    | Reference        |          |
| Liver                                             | 33             | 0.70 (0.48-1.03) | 0.07     | 18                    | 0.74 (0.44-1.26) | 0.27     |
| Heart and/or lung                                 | 26             | 0.84 (0.55-1.28) | 0.41     | 24                    | 1.51 (0.94-2.42) | 0.09     |
| Other or multiple                                 | 4              | 0.35 (0.13-0.94) | 0.04     | 3                     | 0.51 (0.16-1.61) | 0.25     |
| <b>Calendar year of transplant</b>                |                |                  |          |                       |                  |          |
| 1987-1994                                         | 19             | Reference        |          | 29                    | Reference        |          |
| 1995-2002                                         | 86             | 1.56 (0.95-2.56) | 0.08     | 37                    | 0.44 (0.27-0.72) | 0.001    |
| 2003-2010                                         | 51             | 0.95 (0.56-1.60) | 0.84     | 30                    | 0.36 (0.22-0.61) | <0.001   |
| 2011-2017                                         | 30             | 1.73 (0.97-3.07) | 0.06     | 12                    | 0.45 (0.23-0.89) | 0.02     |
| <b>Posttransplant basal cell carcinoma</b>        |                |                  |          |                       |                  |          |
| No                                                | 184            | Reference        |          | 106                   | Reference        |          |
| Yes                                               | 2              | 0.72 (0.18-2.92) | 0.65     | 2                     | 1.26 (0.31-5.10) | 0.75     |
| <b>Posttransplant squamous cell carcinoma</b>     |                |                  |          |                       |                  |          |
| No                                                | 186            | Reference        |          | 104                   | Reference        |          |
| Yes                                               | 0              | No estimate      |          | 4                     | 1.89 (0.70-5.14) | 0.21     |
| <b>Annual mean daily UVR exposure<sup>a</sup></b> |                |                  |          |                       |                  |          |
| Quartile 1                                        | 27             | Reference        |          | 31                    | Reference        |          |
| Quartile 2                                        | 64             | 1.99 (1.27-3.13) | 0.003    | 22                    | 0.60 (0.35-1.03) | 0.06     |

|                              |     |                  |        |    |                  |      |
|------------------------------|-----|------------------|--------|----|------------------|------|
| Quartile 3                   | 33  | 1.14 (0.68-1.89) | 0.62   | 26 | 0.78 (0.46-1.32) | 0.35 |
| Quartile 4                   | 62  | 2.33 (1.48-3.65) | <0.001 | 29 | 0.95 (0.57-1.57) | 0.84 |
| <i>P</i> for trend           |     |                  | 0.007  |    |                  | 0.93 |
| <b>Time since transplant</b> |     |                  |        |    |                  |      |
| Within 1 year                | 73  | Reference        |        | 13 | Reference        |      |
| 1 to 4.9 years               | 94  | 0.43 (0.31-0.58) | <0.001 | 36 | 0.92 (0.49-1.73) | 0.78 |
| 5 to 9.9 years               | 14  | 0.10 (0.05-0.17) | <0.001 | 37 | 1.43 (0.76-2.69) | 0.27 |
| ≥10 years                    | 5   | 0.07 (0.03-0.16) | <0.001 | 22 | 1.63 (0.82-3.23) | 0.17 |
| <i>P</i> for trend           |     |                  | <0.001 |    |                  | 0.03 |
| <b>Transplant number</b>     |     |                  |        |    |                  |      |
| First                        | 176 | Reference        |        | 99 | Reference        |      |
| Second or later              | 10  | 0.62 (0.33-1.17) | 0.14   | 9  | 0.99 (0.50-1.96) | 0.98 |

Abbreviations:

IRR – Incidence rate ratio

CI – Confidence interval

UVR – UV radiation

<sup>a</sup> Quartile cutoffs for ambient UVR (4.6-26.3, 26.4-34.2, 34.3-45.5, and 45.6-84.1 mW/m<sup>2</sup>) were based on the UVR (UV-B, 305nm) distribution among the transplant population.

**eTable 4. Transplant donor and recipient EBV serologic status at time of transplant and lymphoma risk**

| Characteristic                                           | B or T-cell lymphoma |                  |      | Diffuse large B-cell lymphoma |                          |      | T-cell lymphoma |                  |      | EBV-associated lymphoma <sup>a</sup> |                          |      |
|----------------------------------------------------------|----------------------|------------------|------|-------------------------------|--------------------------|------|-----------------|------------------|------|--------------------------------------|--------------------------|------|
|                                                          | No.                  | IRR (95% CI)     | P    | No.                           | IRR (95% CI)             | P    | No.             | IRR (95% CI)     | P    | No.                                  | IRR (95% CI)             | P    |
| Recipient (R) status <sup>b</sup>                        |                      |                  |      |                               |                          |      |                 |                  |      |                                      |                          |      |
| Negative                                                 | 9                    | Reference        |      | 1                             | Reference                |      | 8               | Reference        |      | 1                                    | Reference                |      |
| Positive                                                 | 30                   | 0.70 (0.33-1.48) | 0.35 | 3                             | 0.63 (0.07-6.06)         | 0.69 | 27              | 0.71 (0.32-1.56) | 0.39 | 4                                    | 0.84 (0.09-7.52)         | 0.88 |
| Combined recipient (R) and donor (D) status <sup>c</sup> |                      |                  |      |                               |                          |      |                 |                  |      |                                      |                          |      |
| R negative/D negative                                    | 1                    | Reference        |      | 0                             | Reference                |      | 1               | Reference        |      | 0                                    | Reference                |      |
| R positive/D negative, positive or unknown               | 30                   | 0.52 (0.07-3.78) | 0.51 | 3                             | No estimate <sup>d</sup> |      | 27              | 0.46 (0.06-3.41) | 0.45 | 4                                    | No estimate <sup>d</sup> |      |
| R negative/D positive                                    | 4                    | 0.70 (0.08-6.26) | 0.75 | 1                             | No estimate <sup>d</sup> |      | 3               | 0.52 (0.05-5.05) | 0.58 | 1                                    | No estimate <sup>d</sup> |      |

Abbreviations:

IRR – Incidence rate ratio

CI – Confidence interval

EBV – Epstein-Barr virus

<sup>a</sup> This category includes extranodal NK/T-cell lymphoma and diffuse large B-cell lymphoma.

<sup>b</sup> Recipient EBV serologic status was unknown for 69 (64% of cases) B or T-cell lymphomas, 19 (83% of cases) diffuse large B-cell lymphomas, 50 (59% of cases) T-cell lymphomas, and 20 (80% of cases) EBV-associated lymphomas.

<sup>c</sup> Combined donor and recipient EBV serologic status was unknown for 73 (68% of cases) B or T-cell lymphomas, 19 (83% of cases) diffuse large B-cell lymphomas, 54 (64% of cases) T-cell lymphomas, and 20 (80% of cases) EBV-associated lymphomas.

<sup>d</sup> The incidence rate ratio could not be calculated because of a zero value in the denominator.



**eTable 5. Baseline induction and maintenance immunosuppressive therapy and risk for melanoma, Merkel cell carcinoma, and adnexal cancers in transplant recipients**

| Characteristic                          | Melanoma |                  |        | Merkel cell carcinoma |                  |        | Sebaceous carcinoma |                  |      | Nonsebaceous adnexal cancers |                  |      |
|-----------------------------------------|----------|------------------|--------|-----------------------|------------------|--------|---------------------|------------------|------|------------------------------|------------------|------|
|                                         | No.      | IRR (95% CI)     | P      | No.                   | IRR (95% CI)     | P      | No.                 | IRR (95% CI)     | P    | No.                          | IRR (95% CI)     | P    |
| <b>Total</b>                            | 1,471    |                  |        | 334                   |                  |        | 170                 |                  |      | 84                           |                  |      |
| <b>Medication exposures</b>             |          |                  |        |                       |                  |        |                     |                  |      |                              |                  |      |
| <b>Induction therapy</b>                |          |                  |        |                       |                  |        |                     |                  |      |                              |                  |      |
| Corticosteroids                         | 907      | 1.03 (0.92-1.14) | 0.63   | 194                   | 0.88 (0.71-1.10) | 0.27   | 105                 | 1.03 (0.76-1.40) | 0.85 | 49                           | 0.89 (0.58-1.38) | 0.61 |
| Polyclonal antibody                     | 315      | 0.96 (0.85-1.09) | 0.53   | 67                    | 0.89 (0.68-1.16) | 0.37   | 50                  | 1.47 (1.06-2.04) | 0.02 | 19                           | 1.03 (0.62-1.72) | 0.91 |
| Monoclonal antibody (OKT3)              | 71       | 1.05 (0.83-1.33) | 0.69   | 8                     | 0.51 (0.25-1.02) | 0.06   | 5                   | 0.63 (0.26-1.53) | 0.30 | 5                            | 1.31 (0.53-3.23) | 0.56 |
| Campath                                 | 54       | 1.08 (0.82-1.42) | 0.58   | 12                    | 1.06 (0.59-1.88) | 0.85   | 8                   | 1.40 (0.69-2.85) | 0.35 | 5                            | 1.79 (0.73-4.43) | 0.21 |
| IL-2 receptor antagonist                | 296      | 1.10 (0.97-1.25) | 0.15   | 69                    | 1.13 (0.87-1.48) | 0.35   | 34                  | 1.09 (0.75-1.59) | 0.66 | 16                           | 1.03 (0.59-1.77) | 0.93 |
| Rituximab                               | 4        | 1.11 (0.42-2.96) | 0.83   | 0                     | No Estimate      |        | 0                   | No Estimate      |      | 0                            | No Estimate      |      |
| <b>Maintenance therapy</b>              |          |                  |        |                       |                  |        |                     |                  |      |                              |                  |      |
| Azathioprine                            | 305      | 1.17 (1.03-1.33) | 0.01   | 91                    | 1.68 (1.32-2.13) | <0.001 | 37                  | 1.25 (0.87-1.79) | 0.24 | 16                           | 1.05 (0.61-1.82) | 0.85 |
| Cyclosporine                            | 572      | 1.20 (1.08-1.33) | 0.001  | 136                   | 1.29 (1.04-1.61) | 0.02   | 60                  | 1.03 (0.75-1.41) | 0.87 | 36                           | 1.41 (0.92-2.18) | 0.12 |
| Mycophenolate mofetil                   | 929      | 1.08 (0.97-1.20) | 0.15   | 169                   | 0.65 (0.52-0.80) | <0.001 | 111                 | 1.19 (0.87-1.63) | 0.29 | 43                           | 0.66 (0.43-1.02) | 0.06 |
| Mammalian target of rapamycin inhibitor | 58       | 0.72 (0.55-0.93) | 0.01   | 27                    | 1.54 (1.04-2.28) | 0.03   | 10                  | 1.09 (0.58-2.07) | 0.78 | 7                            | 1.59 (0.73-3.45) | 0.24 |
| Corticosteroids                         | 1,255    | 1.02 (0.88-1.18) | 0.80   | 289                   | 1.13 (0.82-1.54) | 0.46   | 149                 | 1.24 (0.79-1.96) | 0.35 | 73                           | 1.16 (0.62-2.19) | 0.64 |
| Tacrolimus                              | 728      | 0.82 (0.74-0.91) | <0.001 | 152                   | 0.70 (0.57-0.87) | 0.001  | 96                  | 1.09 (0.81-1.48) | 0.57 | 36                           | 0.63 (0.41-0.97) | 0.04 |

|                                                                          |     |                  |        |     |                  |       |     |                  |      |    |                  |      |
|--------------------------------------------------------------------------|-----|------------------|--------|-----|------------------|-------|-----|------------------|------|----|------------------|------|
| <b>Combination therapy</b>                                               |     |                  |        |     |                  |       |     |                  |      |    |                  |      |
| Tacrolimus or mycophenolate mofetil without cyclosporine or azathioprine | 689 | Reference        |        | 134 | Reference        |       | 88  | Reference        |      | 33 | Reference        |      |
| Cyclosporine or azathioprine without tacrolimus or mycophenolate mofetil | 780 | 1.03 (0.93-1.14) | 0.53   | 200 | 1.36 (1.09-1.70) | 0.006 | 82  | 0.85 (0.63-1.15) | 0.29 | 51 | 1.41 (0.91-2.19) | 0.12 |
| Other medication combinations                                            | 2   | 0.26 (0.06-1.02) | 0.05   | 0   | No Estimate      |       | 0   | No Estimate      |      | 0  | No Estimate      |      |
| <b>Medication exposures adjusted for calendar year of transplant</b>     |     |                  |        |     |                  |       |     |                  |      |    |                  |      |
| <b>Induction therapy</b>                                                 |     |                  |        |     |                  |       |     |                  |      |    |                  |      |
| Corticosteroids                                                          | 907 | 1.05 (0.94-1.17) | 0.41   | 194 | 1.03 (0.82-1.30) | 0.79  | 105 | 1.00 (0.73-1.37) | 1.00 | 49 | 1.01 (0.64-1.59) | 0.96 |
| Polyclonal antibody                                                      | 315 | 0.95 (0.84-1.08) | 0.44   | 67  | 0.99 (0.75-1.30) | 0.93  | 50  | 1.53 (1.08-2.15) | 0.02 | 19 | 1.11 (0.66-1.89) | 0.69 |
| Monoclonal antibody (OKT3)                                               | 71  | 1.07 (0.84-1.36) | 0.60   | 8   | 0.42 (0.21-0.86) | 0.02  | 5   | 0.62 (0.25-1.53) | 0.30 | 5  | 1.20 (0.47-3.02) | 0.71 |
| Campath                                                                  | 54  | 1.06 (0.81-1.40) | 0.66   | 12  | 1.25 (0.69-2.26) | 0.46  | 8   | 1.43 (0.69-2.96) | 0.33 | 5  | 2.04 (0.80-5.20) | 0.14 |
| IL-2 receptor antagonist                                                 | 296 | 1.11 (0.97-1.26) | 0.13   | 69  | 1.38 (1.04-1.82) | 0.03  | 34  | 1.07 (0.73-1.57) | 0.72 | 16 | 1.16 (0.66-2.05) | 0.60 |
| Rituximab                                                                | 4   | 1.09 (0.41-2.92) | 0.86   | 0   | No Estimate      |       | 0   | No Estimate      |      | 0  | No Estimate      |      |
| <b>Maintenance therapy</b>                                               |     |                  |        |     |                  |       |     |                  |      |    |                  |      |
| Azathioprine                                                             | 305 | 1.25 (1.06-1.46) | 0.007  | 91  | 1.19 (0.86-1.63) | 0.29  | 37  | 1.53 (0.98-2.39) | 0.06 | 16 | 0.64 (0.32-1.29) | 0.21 |
| Cyclosporine                                                             | 572 | 1.33 (1.17-1.51) | <0.001 | 136 | 0.96 (0.73-1.26) | 0.77  | 60  | 1.06 (0.73-1.56) | 0.75 | 36 | 1.27 (0.73-2.20) | 0.39 |

|                                                                          |           |                  |            |         |                  |       |         |                  |          |    |                  |          |
|--------------------------------------------------------------------------|-----------|------------------|------------|---------|------------------|-------|---------|------------------|----------|----|------------------|----------|
| Mycophenolate mofetil                                                    | 929       | 1.14 (1.00-1.30) | 0.05       | 16<br>9 | 0.84 (0.64-1.11) | 0.22  | 11<br>1 | 1.22 (0.84-1.78) | 0.3<br>0 | 43 | 0.76 (0.45-1.30) | 0.3<br>2 |
| of Mammalian target rapamycin inhibitor                                  | 58        | 0.72 (0.55-0.94) | 0.02       | 27      | 1.74 (1.17-2.60) | 0.006 | 10      | 1.05 (0.55-1.99) | 0.8<br>9 | 7  | 1.74 (0.79-3.82) | 0.1<br>7 |
| Corticosteroids                                                          | 1,25<br>5 | 1.03 (0.89-1.20) | 0.68       | 28<br>9 | 1.03 (0.75-1.43) | 0.84  | 14<br>9 | 1.25 (0.79-2.00) | 0.3<br>4 | 73 | 1.12 (0.58-2.14) | 0.7<br>4 |
| Tacrolimus                                                               | 728       | 0.77 (0.68-0.86) | <0.00<br>1 | 15<br>2 | 0.83 (0.64-1.07) | 0.15  | 96      | 1.07 (0.75-1.51) | 0.7<br>2 | 36 | 0.64 (0.38-1.07) | 0.0<br>9 |
| <b>Combination therapy</b>                                               |           |                  |            |         |                  |       |         |                  |          |    |                  |          |
| Tacrolimus or mycophenolate mofetil without cyclosporine or azathioprine | 689       | Reference        |            | 13<br>4 | Reference        |       | 88      | Reference        |          | 33 | Reference        |          |
| Cyclosporine or azathioprine without tacrolimus or mycophenolate mofetil | 780       | 1.07 (0.94-1.21) | 0.32       | 20<br>0 | 1.06 (0.80-1.41) | 0.68  | 82      | 0.78 (0.54-1.14) | 0.2<br>0 | 51 | 1.30 (0.75-2.27) | 0.3<br>5 |
| Other medication combinations                                            | 2         | 0.26 (0.07-1.05) | 0.06       | 0       | No Estimate      |       | 0       | No Estimate      |          | 0  | No Estimate      |          |

Abbreviations:

IRR – Incidence rate ratio

CI – Confidence interval

**eTable 6. Baseline induction and maintenance immunosuppressive therapy and risk for Kaposi sarcoma and lymphoma in transplant recipients**

| Characteristic                                                           | Kaposi sarcoma |                  |      | B- or T-cell lymphoma |                  |        |
|--------------------------------------------------------------------------|----------------|------------------|------|-----------------------|------------------|--------|
|                                                                          | No             | IRR (95% CI)     | P    | No.                   | IRR (95% CI)     | P      |
| <b>Total</b>                                                             | 186            |                  |      | 108                   |                  |        |
| <b>Medication exposures</b>                                              |                |                  |      |                       |                  |        |
| <b>Induction therapy</b>                                                 |                |                  |      |                       |                  |        |
| Corticosteroids                                                          | 116            | 1.06 (0.79-1.42) | 0.71 | 68                    | 1.08 (0.73-1.60) | 0.68   |
| Polyclonal antibody                                                      | 41             | 1.00 (0.71-1.41) | 0.99 | 22                    | 0.90 (0.56-1.44) | 0.67   |
| Monoclonal antibody (OKT3)                                               | 6              | 0.69 (0.31-1.56) | 0.37 | 11                    | 2.35 (1.26-4.38) | 0.007  |
| Campath                                                                  | 3              | 0.46 (0.15-1.45) | 0.19 | 4                     | 1.09 (0.40-2.96) | 0.87   |
| IL-2 receptor antagonist                                                 | 42             | 1.27 (0.90-1.79) | 0.17 | 20                    | 0.99 (0.61-1.61) | 0.97   |
| Rituximab                                                                | 1              | 2.20 (0.31-15.7) | 0.43 | 0                     | No Estimate      |        |
| <b>Maintenance therapy</b>                                               |                |                  |      |                       |                  |        |
| Azathioprine                                                             | 36             | 1.07 (0.75-1.55) | 0.70 | 33                    | 1.97 (1.31-2.97) | 0.001  |
| Cyclosporine                                                             | 69             | 1.11 (0.83-1.50) | 0.49 | 50                    | 1.62 (1.11-2.37) | 0.01   |
| Mycophenolate mofetil                                                    | 114            | 1.00 (0.74-1.34) | 1.00 | 49                    | 0.52 (0.36-0.77) | 0.001  |
| Mammalian target of rapamycin inhibitor                                  | 6              | 0.58 (0.26-1.32) | 0.20 | 4                     | 0.67 (0.25-1.83) | 0.44   |
| Corticosteroids                                                          | 168            | 1.64 (1.01-2.66) | 0.05 | 92                    | 1.01 (0.59-1.71) | 0.98   |
| Tacrolimus                                                               | 85             | 0.71 (0.53-0.94) | 0.02 | 42                    | 0.54 (0.36-0.79) | 0.002  |
| <b>Combination therapy</b>                                               |                |                  |      |                       |                  |        |
| Tacrolimus or mycophenolate mofetil without cyclosporine or azathioprine | 77             | Reference        |      | 48                    | Reference        |        |
| Cyclosporine or azathioprine without tacrolimus or mycophenolate mofetil | 109            | 1.29 (0.97-1.73) | 0.09 | 39                    | 2.21 (1.45-3.37) | <0.001 |
| Other medication combinations                                            | 0              | No Estimate      |      | 21                    | 1.29 (0.77-2.16) | 0.32   |
| <b>Medication exposures adjusted for calendar year of transplant</b>     |                |                  |      |                       |                  |        |
| <b>Induction therapy</b>                                                 |                |                  |      |                       |                  |        |
| Corticosteroids                                                          | 116            | 0.98 (0.72-1.33) | 0.91 | 68                    | 1.34 (0.89-2.02) | 0.16   |
| Polyclonal antibody                                                      | 41             | 1.03 (0.72-1.47) | 0.88 | 22                    | 1.03 (0.64-1.68) | 0.90   |
| Monoclonal antibody (OKT3)                                               | 6              | 0.63 (0.28-1.43) | 0.27 | 11                    | 1.95 (1.03-3.72) | 0.04   |
| Campath                                                                  | 3              | 0.50 (0.16-1.59) | 0.24 | 4                     | 1.39 (0.50-3.89) | 0.53   |
| IL-2 receptor antagonist                                                 | 42             | 1.29 (0.90-1.83) | 0.16 | 20                    | 1.26 (0.76-2.11) | 0.37   |
| Rituximab                                                                | 1              | 2.36 (0.33-17.0) | 0.39 | 0                     | No Estimate      |        |
| <b>Maintenance therapy</b>                                               |                |                  |      |                       |                  |        |
| Azathioprine                                                             | 36             | 1.18 (0.77-1.82) | 0.45 | 33                    | 1.30 (0.76-2.25) | 0.34   |
| Cyclosporine                                                             | 69             | 1.10 (0.77-1.57) | 0.61 | 50                    | 1.22 (0.75-1.97) | 0.43   |
| Mycophenolate mofetil                                                    | 114            | 0.96 (0.68-1.36) | 0.84 | 49                    | 0.67 (0.42-1.09) | 0.11   |
| Mammalian target of rapamycin inhibitor                                  | 6              | 0.59 (0.26-1.34) | 0.21 | 4                     | 0.82 (0.30-2.25) | 0.70   |

|                                                                          |     |                  |      |    |                  |      |
|--------------------------------------------------------------------------|-----|------------------|------|----|------------------|------|
| Corticosteroids                                                          | 168 | 1.55 (0.95-2.55) | 0.08 | 92 | 0.88 (0.51-1.51) | 0.64 |
| Tacrolimus                                                               | 85  | 0.71 (0.52-0.99) | 0.04 | 42 | 0.66 (0.42-1.05) | 0.08 |
| <b>Combination therapy</b>                                               |     |                  |      |    |                  |      |
| Tacrolimus or mycophenolate mofetil without cyclosporine or azathioprine | 77  | Reference        |      | 48 | Reference        |      |
| Cyclosporine or azathioprine without tacrolimus or mycophenolate mofetil | 109 | 1.39 (0.97-2.00) | 0.07 | 39 | 1.62 (0.87-3.04) | 0.13 |
| Other medication combinations                                            | 0   | No Estimate      |      | 21 | 1.30 (0.73-2.29) | 0.37 |

Abbreviations:

IRR – Incidence rate ratio

CI – Confidence interval
